# Supplementary material for: Lipoproteins as Drug Carriers for Cyclosporine A: Optimization of the Entrapment
Source: MDPI journal article supplement (doi:10.3390/ma16031156), 2023-01-29
Supplement: s1 [file s1]

| Donor | Type of Lipoproteins | TG (g/L plasma) | PL (g/L plasma) | TC (g/L plasma) | FC (g/L plasma) | Proteins (g/L plasma) | EC (g/L plasma) | Encapsulation rate (mg/L plasma) |
|-------|----------------------|-----------------|-----------------|-----------------|-----------------|-----------------------|-----------------|----------------------------------|
| 1     | HDL                  | 0.200           | 0.020           | 0.080           | 0.020           | 0.128                 | 0.060           | 15.500                           |
|       | LDL                  | 0.400           | 0.690           | 0.780           | 0.240           | 0.231                 | 0.540           | 21.000                           |
|       | VLDL                 | 0.280           | 0.020           | 0.040           | 0.020           | 0.042                 | 0.020           | 2.300                            |
| 2     | HDL                  | 0.290           | 0.000           | 0.470           | 0.130           | 0.740                 | 0.340           | 34.000                           |
|       | LDL                  | 0.300           | 0.430           | 0.550           | 0.160           | 0.380                 | 0.390           | 8.800                            |
|       | VLDL                 | 0.310           | 0.030           | 0.020           | 0.010           | 0.025                 | 0.010           | 0.900                            |
| 3     | HDL                  | 0.040           | 0.020           | 0.010           | 0.000           | 0.013                 | 0.010           | 0.900                            |
|       | LDL                  | 0.410           | 0.210           | 0.260           | 0.070           | 0.147                 | 0.190           | 8.900                            |
|       | VLDL                 | 0.420           | 0.070           | 0.070           | 0.020           | 0.050                 | 0.050           | 5.200                            |
| 4     | HDL                  | 0.060           | 0.370           | 0.160           | 0.020           | 0.349                 | 0.140           | 11.400                           |
|       | LDL                  | 0.140           | 0.160           | 0.150           | 0.030           | 0.076                 | 0.120           | 6.600                            |
|       | VLDL                 | 0.150           | 0.010           | 0.010           | 0.000           | 0.014                 | 0.010           | 0.400                            |
| 5     | HDL                  | 0.030           | 0.020           | 0.020           | 0.000           | 0.048                 | 0.020           | 4.100                            |
|       | LDL                  | 0.270           | 0.110           | 0.410           | 0.100           | 0.516                 | 0.310           | 24.000                           |
|       | VLDL                 | 0.620           | 0.030           | 0.080           | 0.030           | 0.106                 | 0.050           | 4.700                            |
| 6     | HDL                  | 0.140           | 0.360           | 0.330           | 0.100           | 0.402                 | 0.230           | 38.300                           |
|       | LDL                  | 0.160           | 0.000           | 0.110           | 0.060           | 0.508                 | 0.050           | 24.900                           |
|       | VLDL                 | 2.890           | 0.310           | 0.420           | 0.15            | 0.572                 | 0.270           | 45.000                           |
| 7     | HDL                  | 0.070           | 0.530           | 0.120           | 0.020           | 0.230                 | 0.100           | 21.100                           |
|       | LDL                  | 0.220           | 0.490           | 0.350           | 0.120           | 0.211                 | 0.230           | 15.500                           |
|       | VLDL                 | 0.470           | 0.220           | 0.100           | 0.050           | 0.064                 | 0.050           | 10.000                           |
| 8     | HDL                  | 0.377           | 0.860           | 0.777           | 0.190           | 1.178                 | 0.587           | 75.900                           |
|       | LDL                  | 0.129           | 0.051           | 0.077           | 0.020           | 0.047                 | 0.057           | 2.500                            |
|       | VLDL                 | 0.606           | 0.244           | 0.150           | 0.070           | 0.161                 | 0.080           | 13.000                           |
| 9     | HDL                  | 0.118           | 0.217           | 0.089           | 0.020           | 0.356                 | 0.069           | 33.700                           |
|       | LDL                  | 0.231           | 0.296           | 0.338           | 0.070           | 0.345                 | 0.268           | 26.400                           |
|       | VLDL                 | 0.455           | 0.124           | 0.101           | 0.020           | 0.101                 | 0.081           | 12.400                           |
| 10    | HDL                  | 0.332           | 0.000           | 0.264           | 0.080           | 0.851                 | 0.184           | 84.600                           |
|       | LDL                  | 0.706           | 0.722           | 0.738           | 0.220           | 0.802                 | 0.518           | 46.900                           |
|       | VLDL                 | 0.423           | 0.008           | 0.118           | 0.060           | 0.112                 | 0.058           | 8.900                            |

Supplementary Table S1: The detailed composition of the different lipoproteins and the corresponding association rate with Cyclosporine A.
